# Supplementary material for: Molecular cloning and characterization of a GH10 thermophilic xylanase from hot spring and its potential application in promoting probiotic growth
Source: Research Square preprint supplement (doi:10.21203/rs.3.rs-6988407/v1), 2025-07-14
Supplement: Supplementary file 1 [file 3a36dd6d155324b6cdbc2ae4.docx]

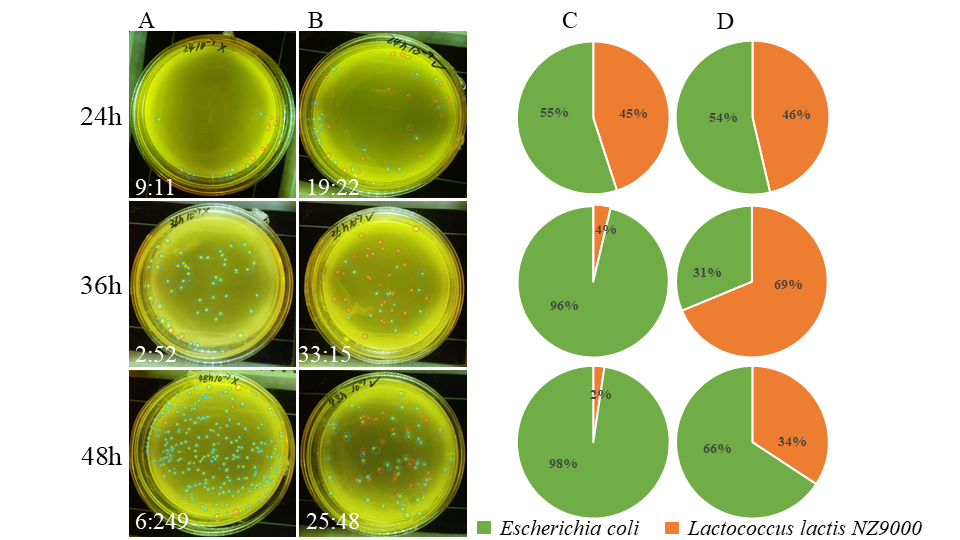


**Supplementary Figure S1. Effect of xylan hydrolysis products (prebiotics) of Lc-Xyn81 on the co-culture of intestinal microbiota.**

Note:Column A&C represents the control group, and column B&D represents the experimental group with added prebiotics. Blue circles indicate Escherichia coli, and red circles indicate *Lactobacillus* species. The bottom left corner of column A&B shows the ratio of *E. coli* to *Lactobacillus* (A:B = *L. lactis* NZ9000: *Escherichia coli*). Columns C&D are pie charts of the percentage proportions of the two strains.


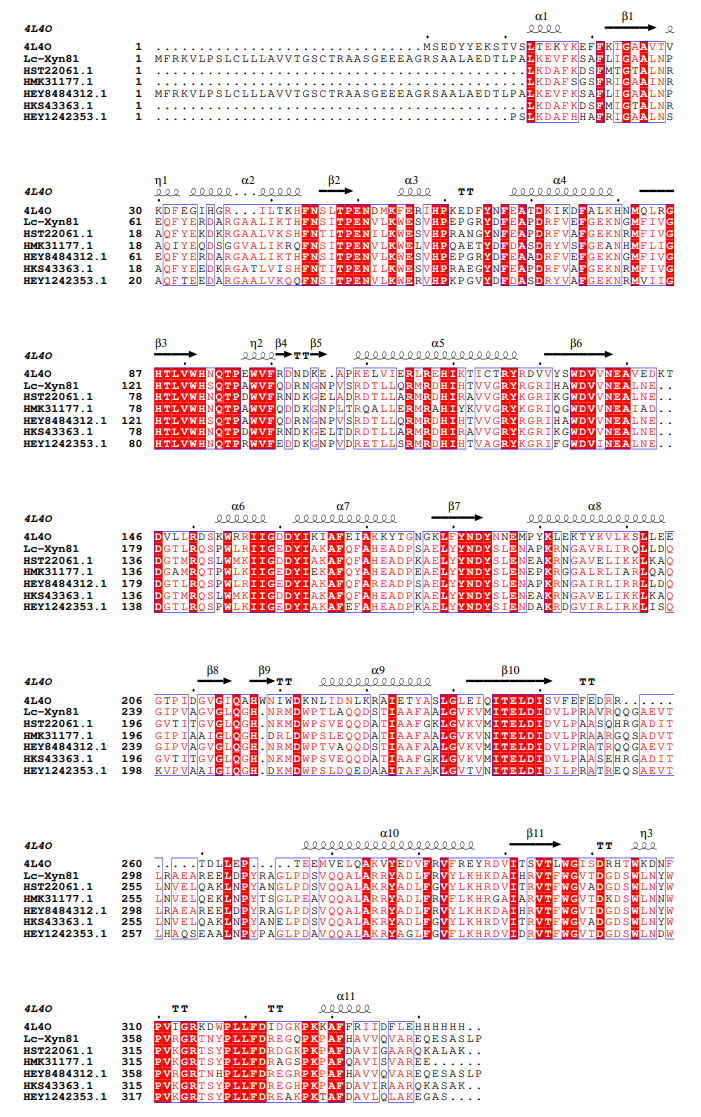


**Supplementary Figure S2. Multiple sequence alignment**

**Supplementary Table S1** **Molecular docking parameters of Lc-Xyn81 and xylooligosaccharides**

| xylooligosaccharides | Molecular docking parameters |
| --- | --- |
| X2 | center_x = 7.945  center_y = 0.0  center_z = 0.0  size_x = 32.25  size_y = 39.0  size_z = 45.75 |
| X3 | center_x = 4.142  center_y = 0.0  center_z = 0.0  size_x = 35.25  size_y = 42.75  size_z = 44.25 |
| X4 | center_x = 8.034  center_y = -1.61  center_z = 2.828  size_x = 27.0  size_y = 38.25  size_z = 36.75 |
| X5 | center_x = 5.668  center_y = 0.0  center_z = 1.12  size_x = 40.0  size_y = 42.0  size_z = 54.0 |


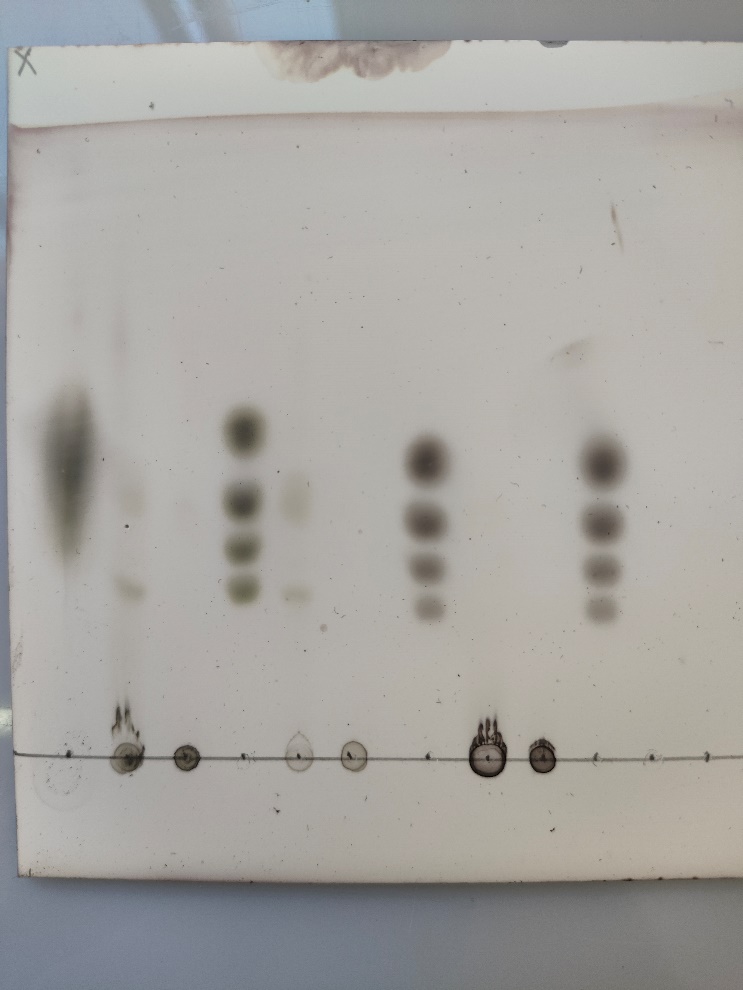


Blots or gels images

Original photo

Original photo

M:X1~X4.

1: Corncob xylan+LC-Xyn81

2: Corncob xylan+ LC-Xyn81( Inactivated enzyme)

3: Beechwood xylan +LC-Xyn81

4:Beechwood xylan + LC-Xyn81( Inactivated enzyme)

5: Bagasse xylan+LC-Xyn81

6:Bagasse xylan + LC-Xyn81( Inactivated enzyme)

Because the first standard sample did not perform well, the lanes 1, 2, 3 and 4 shared the second standard sample.

No oligosaccharide of xylose was detected in lane 5 and lane 6, so it was not included in the main text.


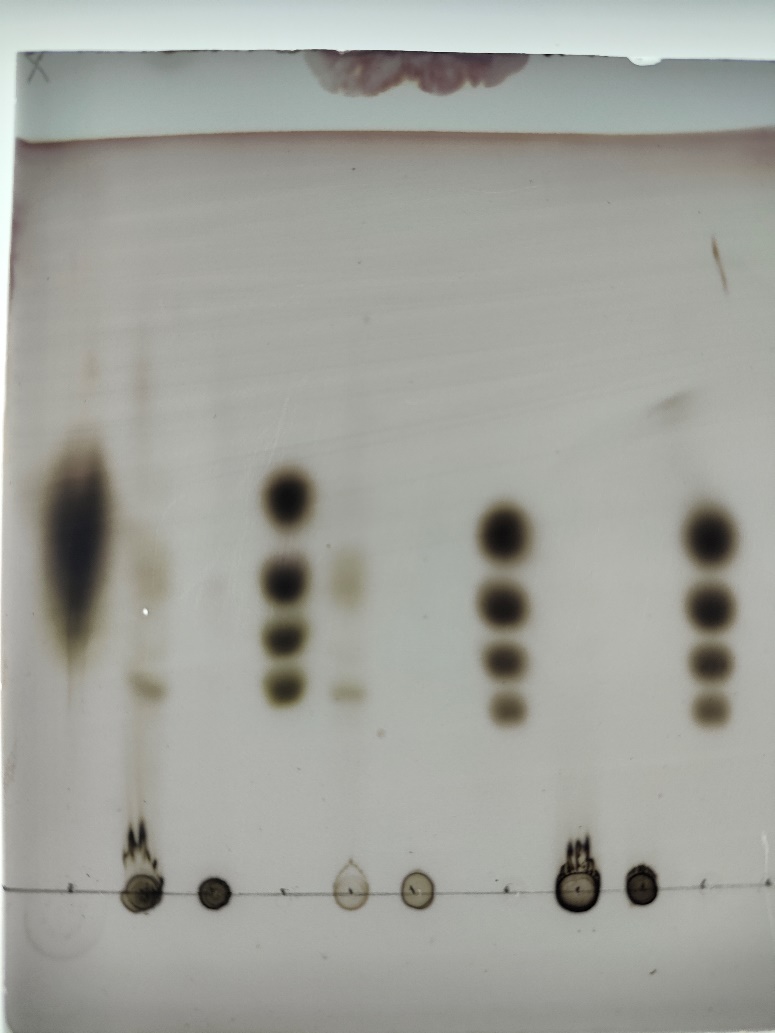


M

M

M

M

1

2

3

4

5

6

The above are TLC images without editing.

The following are TLC images with editing.


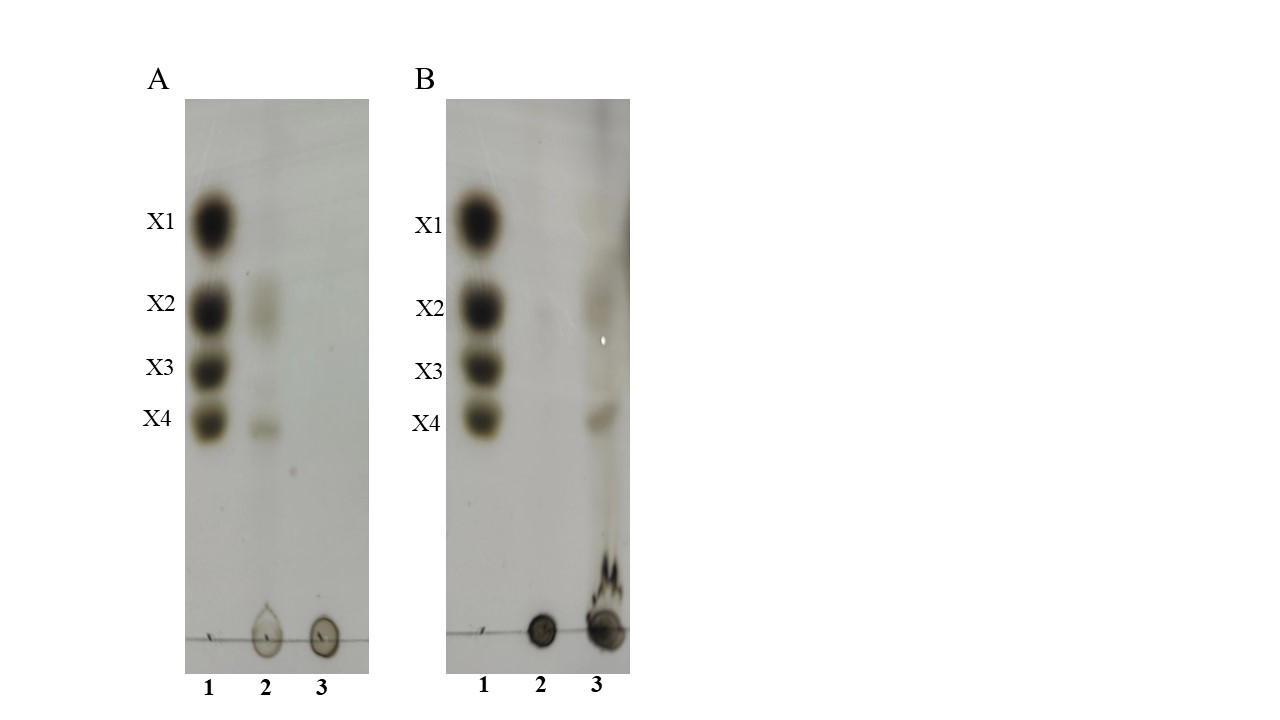


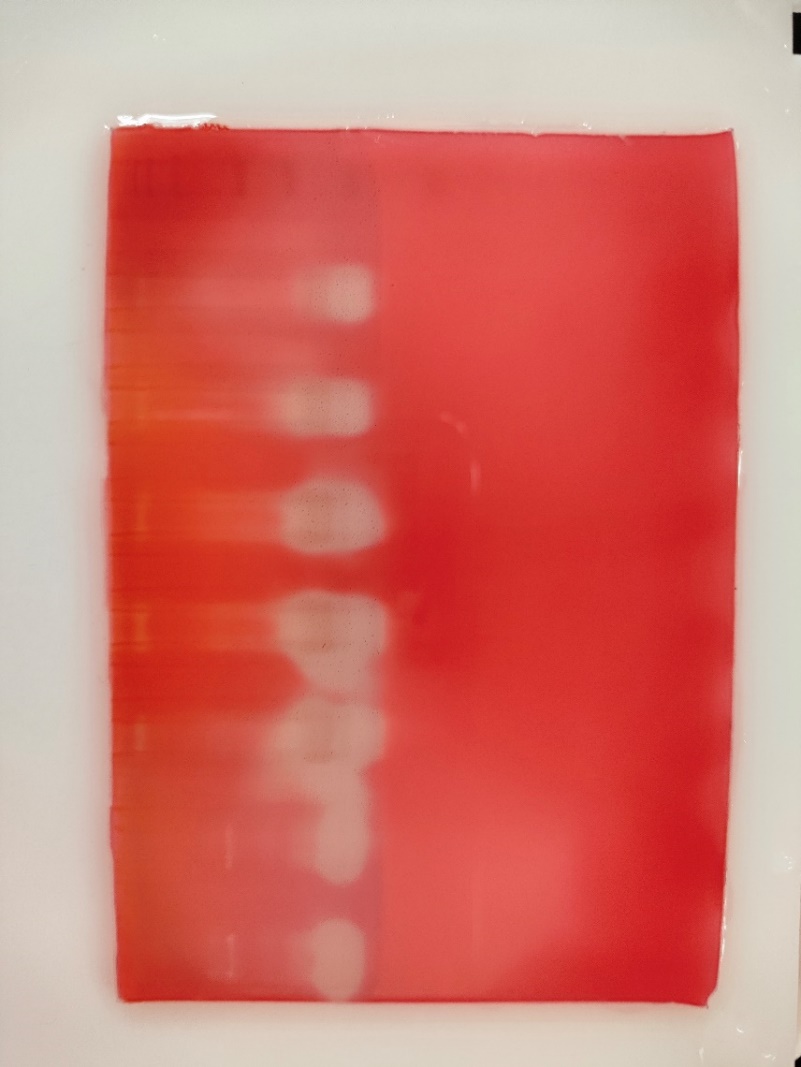


1

2

3

Other xylanases

5

4

1, 2, 3, 4 and 5 lanes all added LC-Xyn81, but the amount of xylanase added to each lane was different.

1：6 µl LC-Xyn81

2: 8 µl LC-Xyn81

3: 10 µl LC-Xyn81

4、5：15 µl LC-Xyn81

2

1


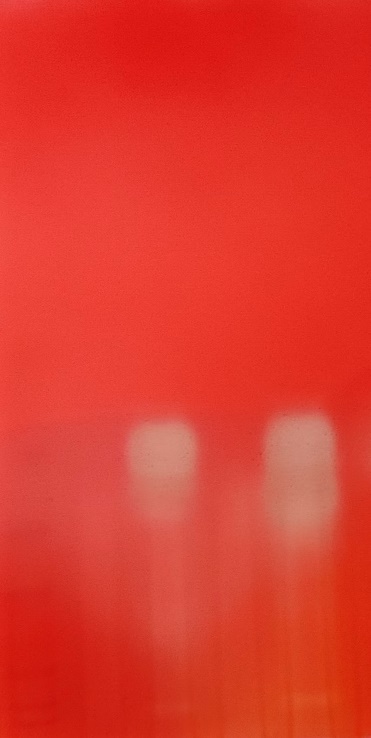

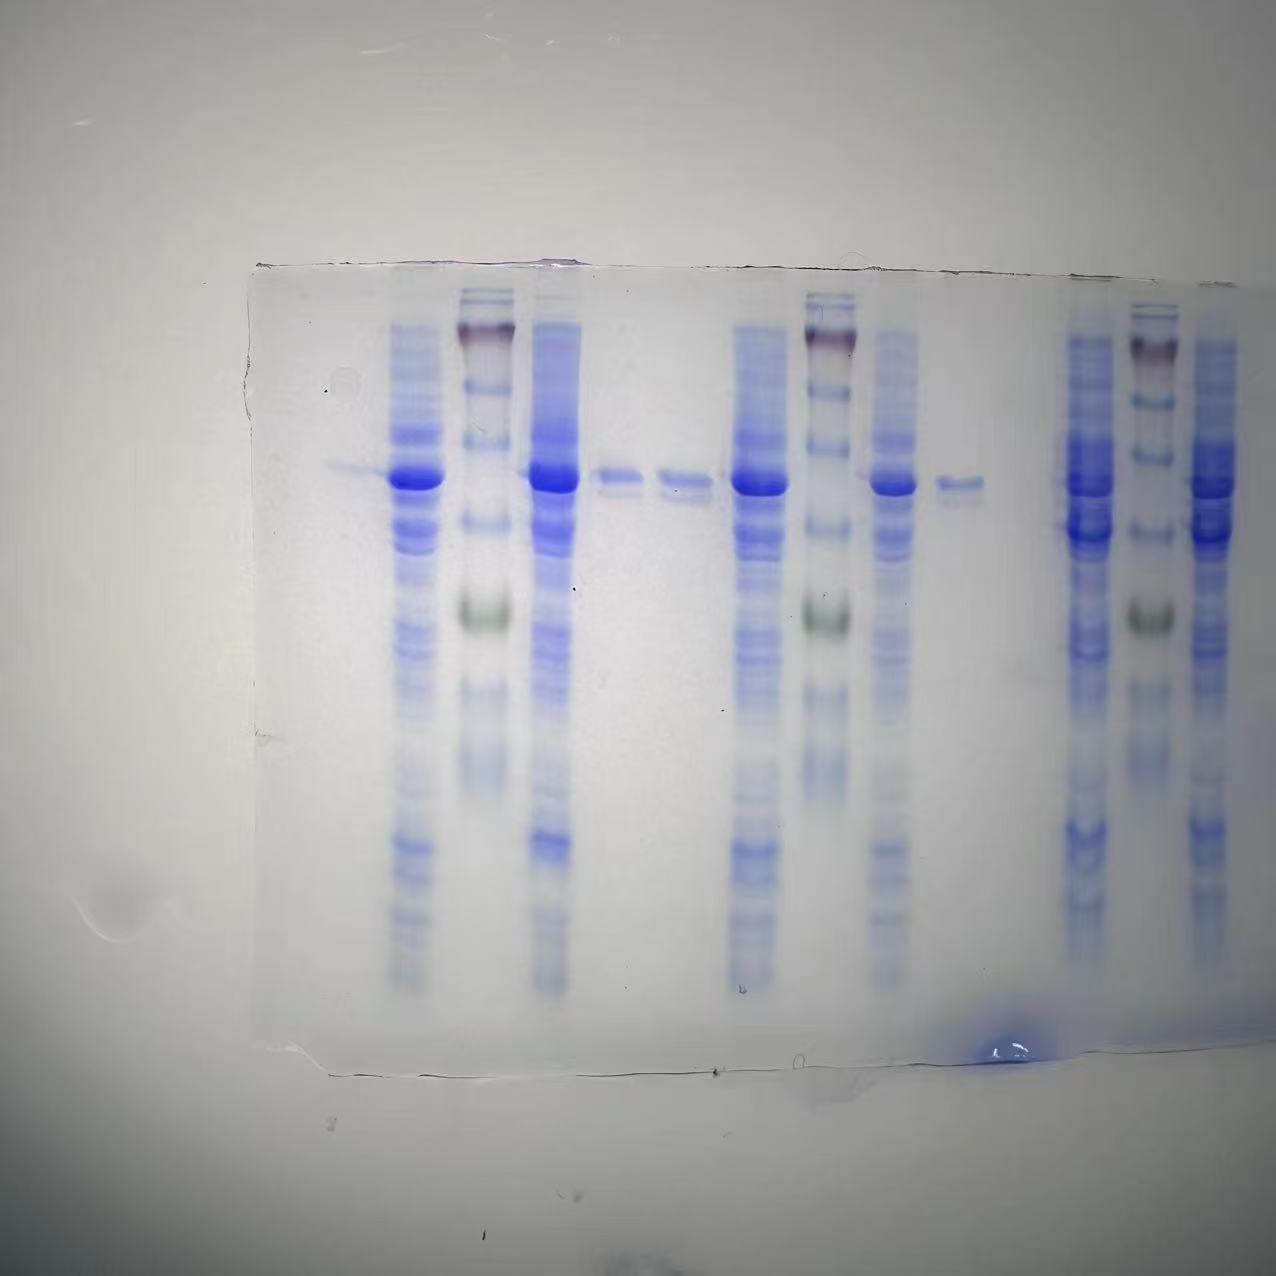


The above are zymogram and protein gel images without editing.

The following are zymogram and protein gel images with editing.

*
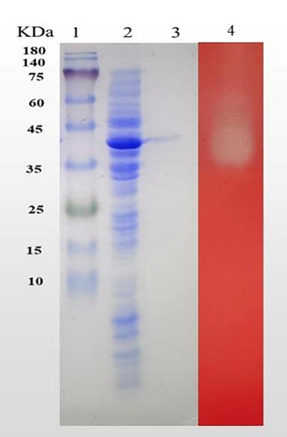
*
